# Supplementary material for: Relative Importance of Heart Failure Events Compared to Stroke and Bleeding in AF Patients
Source: PubMed Central journal article supplement (PMC7957734; doi:10.3390/jcm10050923), 2021-02-28
Supplement: jcm-10-00923-s001.pdf [file jcm-10-00923-s001.pdf]

# Supplementary material

Figure S1. Study flow chart

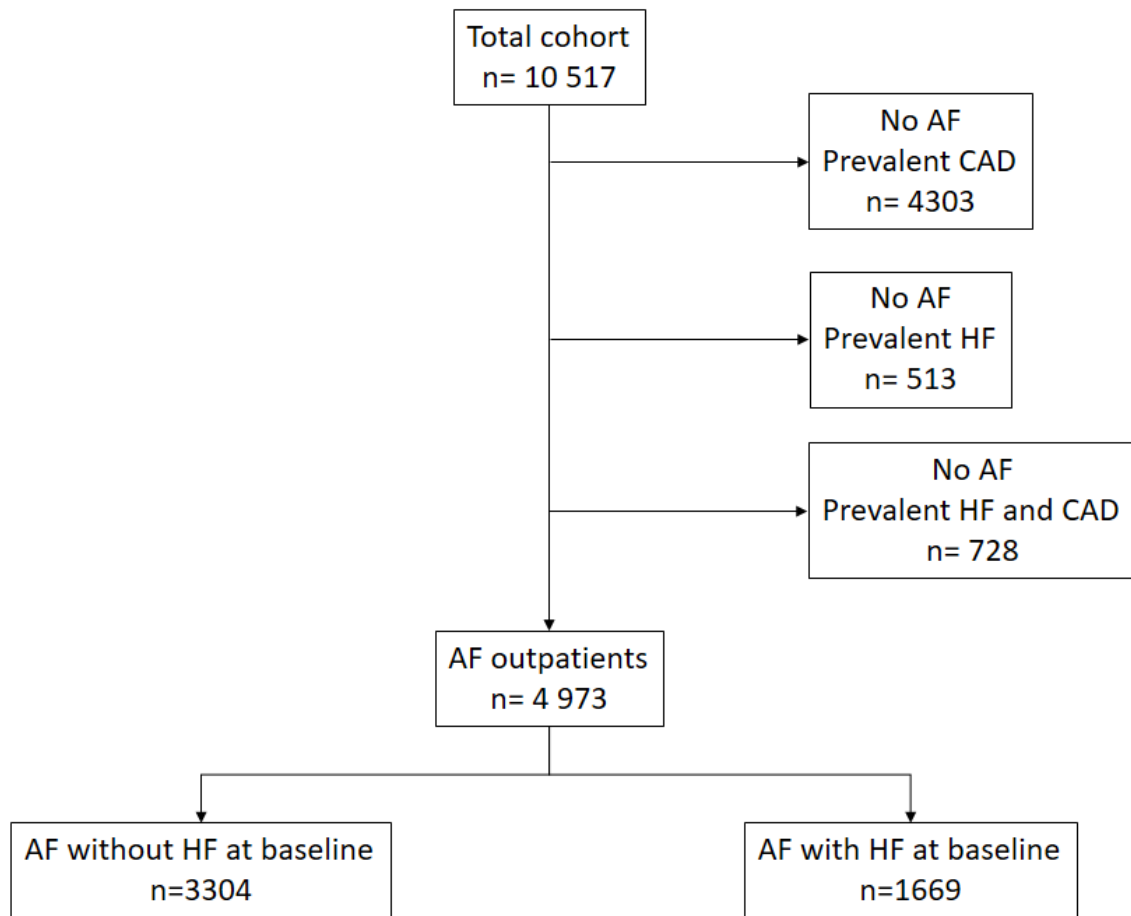

AF: atrial fibrillation, HF: Heart failure, CAD: coronary artery disease

**Figure S2. Overlap between incident events**

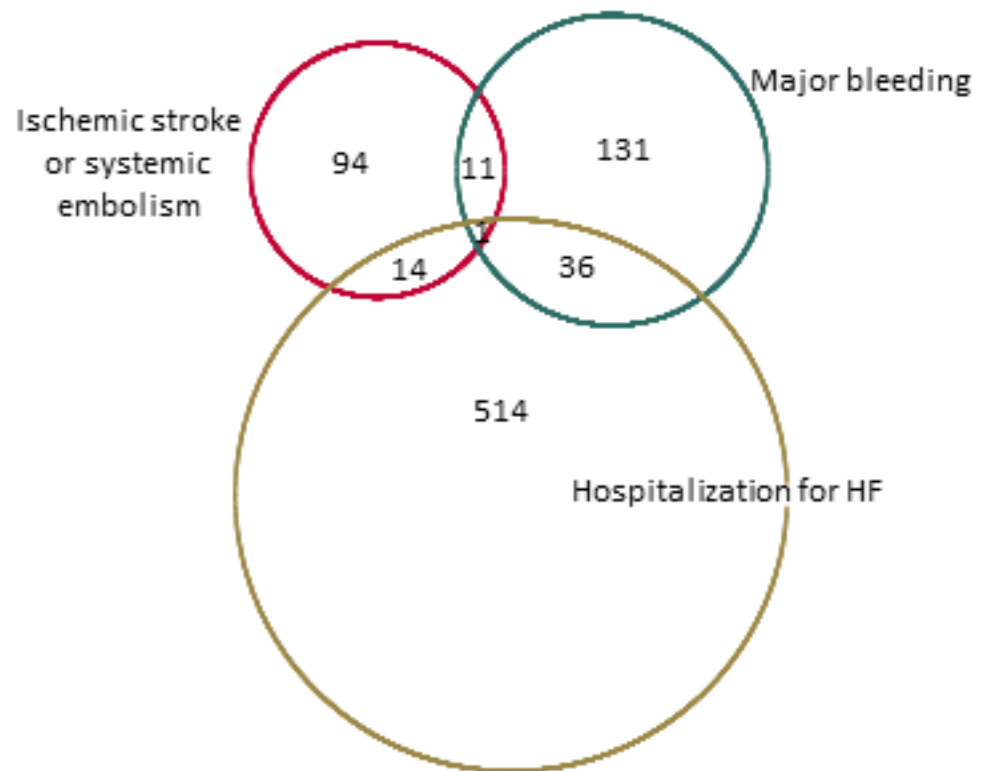

**Table S1. Univariable analysis for correlates of incident events in outpatients with atrial fibrillation.**

|                                                                              | <b>Ischemic stroke/systemic embolism</b> | <b>Major bleeding</b>                | <b>Hospitalization for decompensated HF</b> |
|------------------------------------------------------------------------------|------------------------------------------|--------------------------------------|---------------------------------------------|
|                                                                              | Univariable                              | Univariable                          | Univariable                                 |
| Age (per year)                                                               | 1.04 [1.02-1.06]<br><i>P</i> < 0.001     | 1.03 [1.02-1.05]<br><i>P</i> < 0.001 | 1.04 [1.03-1.05]<br><i>P</i> < 0.001        |
| Women                                                                        | 1.29 [0.90 – 1.85]<br><i>P</i> = 0.163   | 1.02 [0.76-1.36]<br><i>P</i> = 0.917 | 1.09 [0.92-1.28]<br><i>P</i> = 0.332        |
| Hypertension                                                                 | 1.02 [0.70-1.49]<br><i>P</i> = 0.920     | 1.37 [0.99-1.90]<br><i>P</i> = 0.060 | 1.59 [1.31-1.92]<br><i>P</i> < 0.001        |
| Diabetes mellitus                                                            | 1.53 [1.04-2.25]<br><i>P</i> = 0.031     | 1.45 [1.05-1.99]<br><i>P</i> = 0.023 | 1.87 [1.57-2.22]<br><i>P</i> < 0.001        |
| Permanent AF                                                                 | 1.73 [1.21-2.48]<br><i>P</i> = 0.003     | 1.66 [1.24-2.22]<br><i>P</i> = 0.001 | 1.69 [1.44-2.00]<br><i>P</i> < 0.001        |
| Underlying mechanical prosthetic valve or moderate to severe mitral stenosis | 1.41 [0.83-2.39]<br><i>P</i> = 0.199     | 1.92 [1.30-2.82]<br><i>P</i> = 0.001 | 1.41 [1.11-1.80]<br><i>P</i> = 0.005        |
| LVEF (per %)                                                                 | 0.99 [0.97-1.01]<br><i>P</i> = 0.135     | 0.98 [0.97-0.99]<br><i>P</i> < 0.001 | 0.95 [0.94-0.96]<br><i>P</i> < 0.001        |
| History of CAD                                                               | 1.55 [1.06-2.27]<br><i>P</i> = 0.023     | 1.51 [1.11-2.06]<br><i>P</i> = 0.009 | 2.17 [1.83-2.56]<br><i>P</i> < 0.001        |
| History of HF                                                                | 1.75 [1.22-2.52]<br><i>P</i> = 0.002     | 2.13 [1.59-2.86]<br><i>P</i> < 0.001 | 4.86 [4.01-5.79]<br><i>P</i> < 0.001        |
| Previous stroke                                                              | 2.46 [1.53-3.94]<br><i>P</i> < 0.0001    | 1.70 [1.10-2.64]<br><i>P</i> = 0.017 | 1.21 [0.91-1.60]<br><i>P</i> = 0.189        |
| History of PAD                                                               | 2.11 [1.37-3.26]<br><i>P</i> = 0.001     | 1.52 [1.03-2.25]<br><i>P</i> = 0.037 | 1.58 [1.26-1.96]<br><i>P</i> < 0.001        |
| Oral anticoagulation                                                         | 0.84 [0.55-1.27]<br><i>P</i> = 0.402     | 1.10 [0.76-1.59]<br><i>P</i> = 0.612 | 1.50 [1.19-1.88]<br><i>P</i> = 0.001        |

Data are hazard ratios [95% confidence intervals] and *P* values. Multivariable analysis was performed using a stepwise approach with forward selection (the *P* value for entering into the model was set at 0.05). HF, heart failure; AF, atrial fibrillation; LVEF, left ventricular ejection fraction; CAD, coronary artery disease; PAD, peripheral artery disease.
